# Supplementary material
Source: PubMed Central journal article supplement (PMC3717580)

# Supplementary Fig. S1

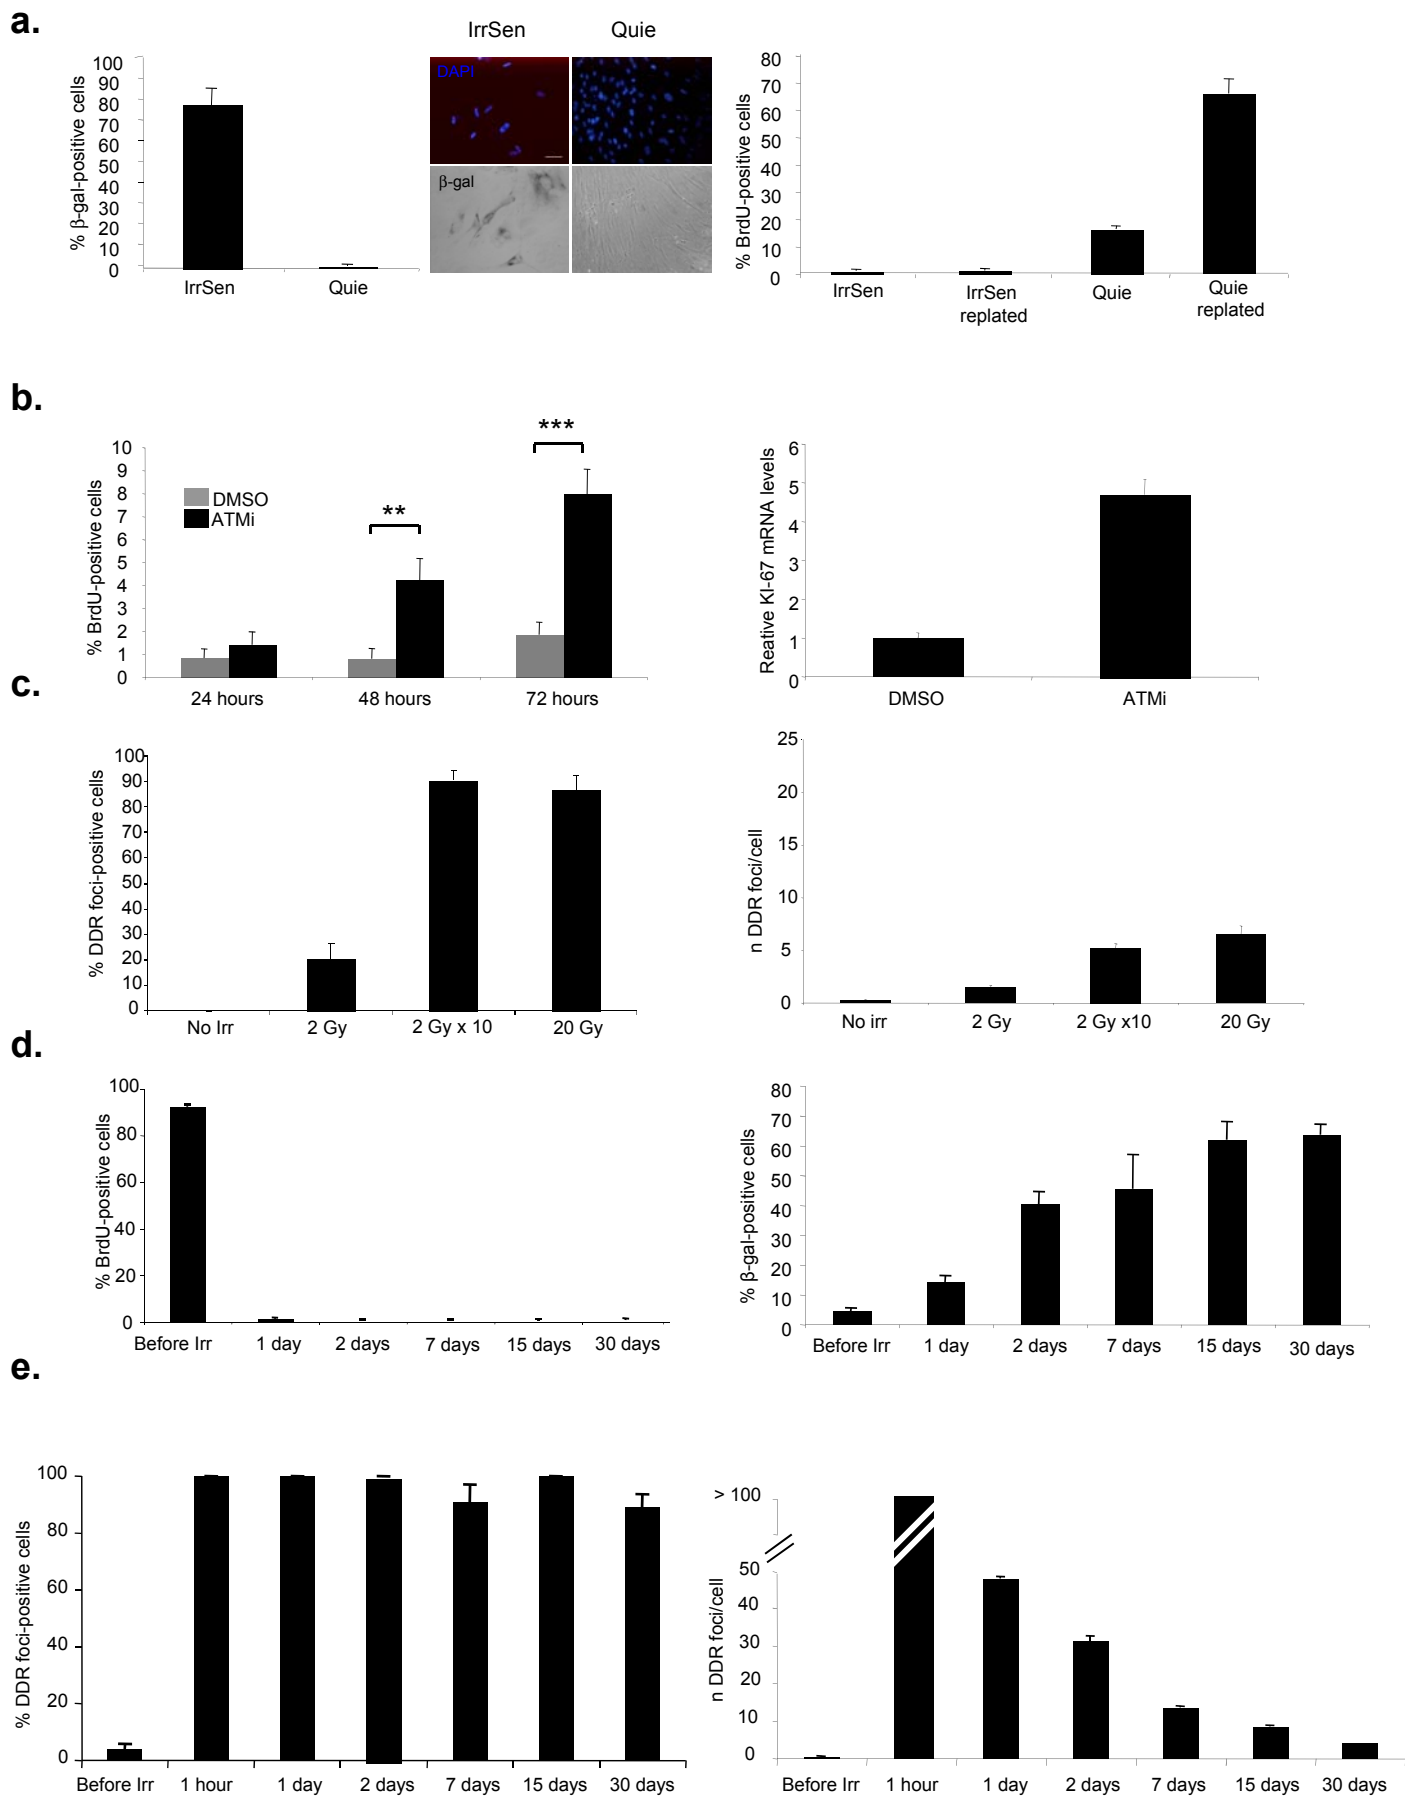

## Supplementary Fig. S2

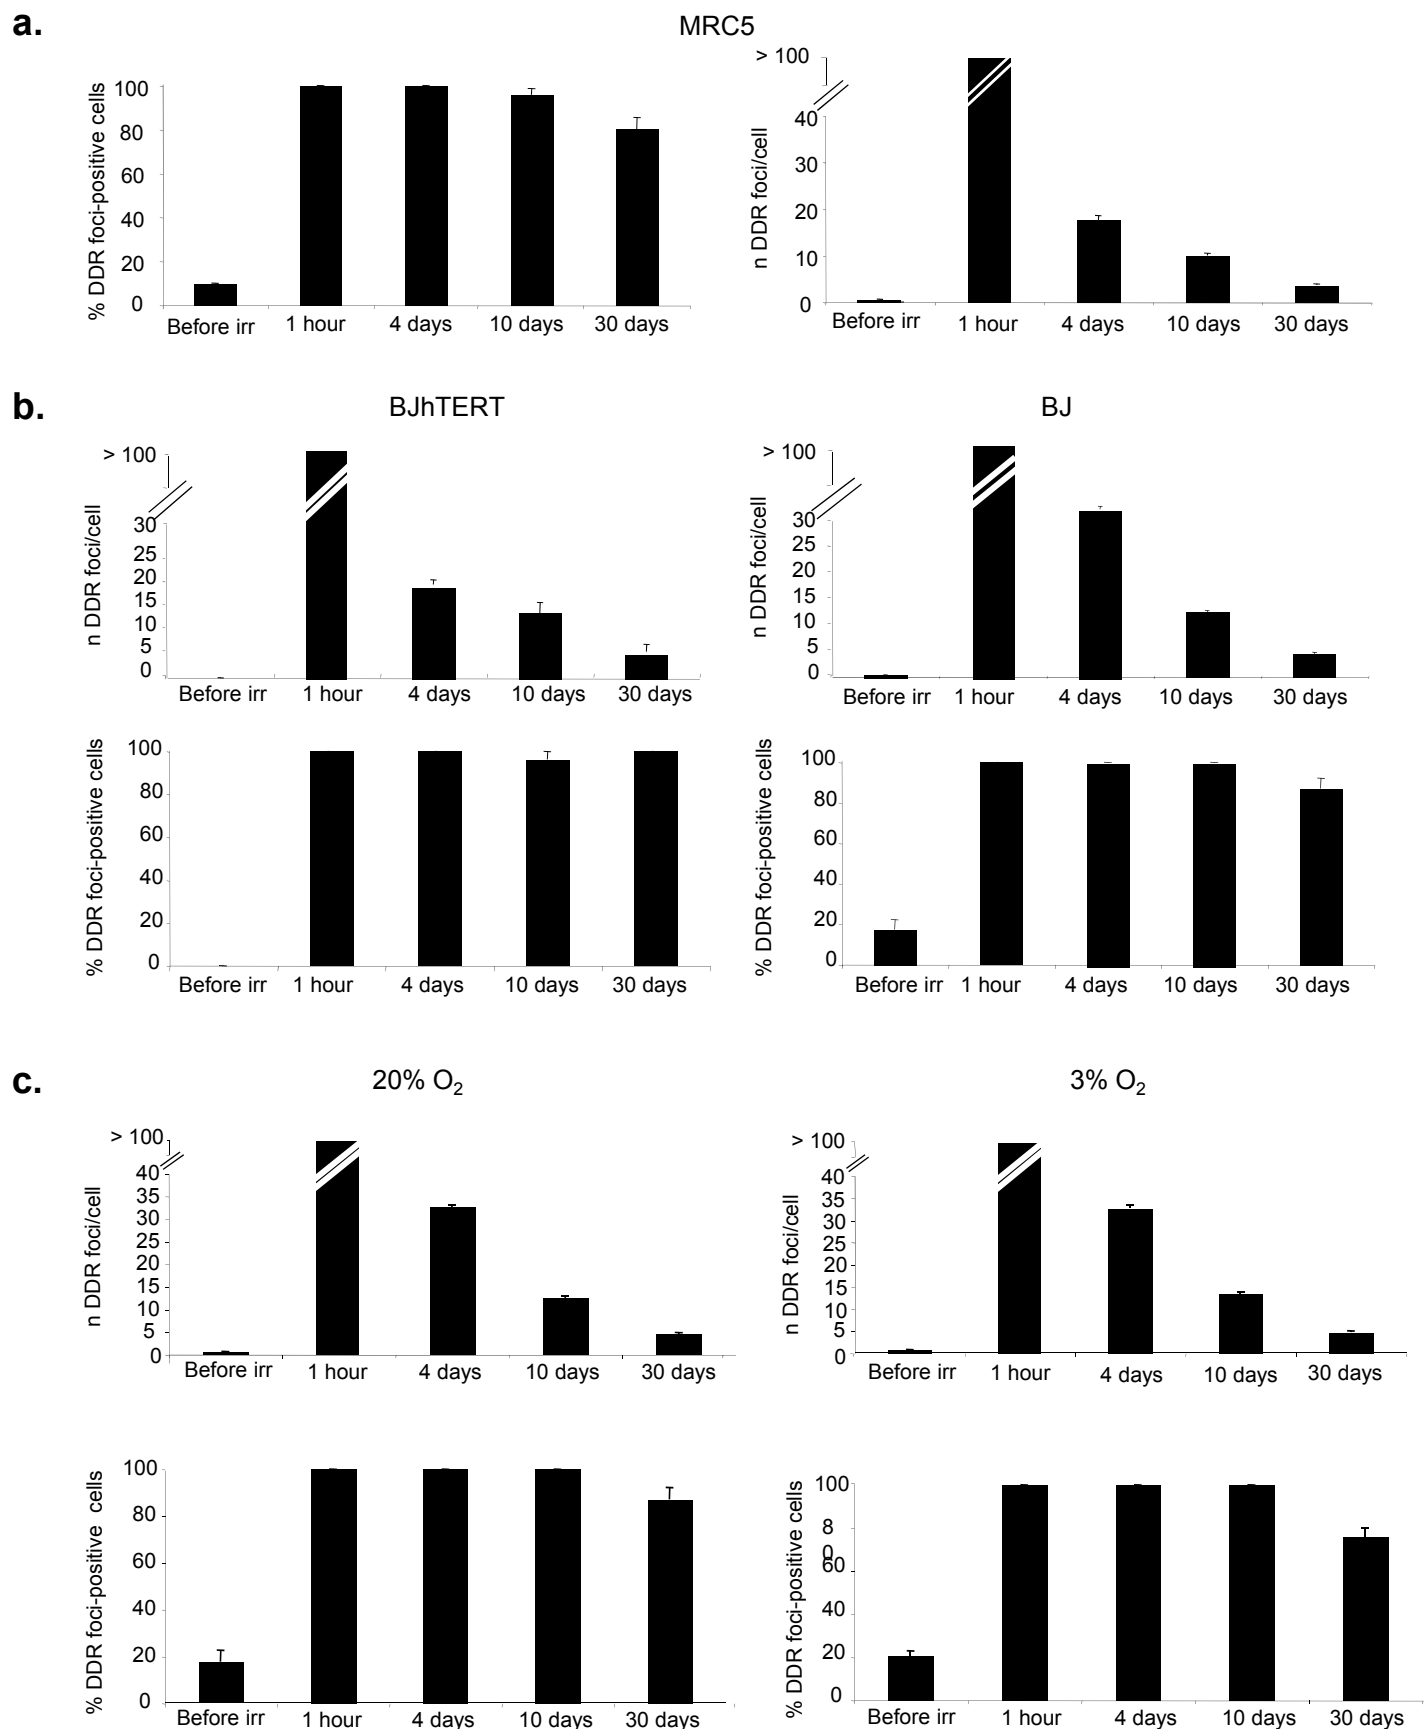

# Supplementary Fig. S3

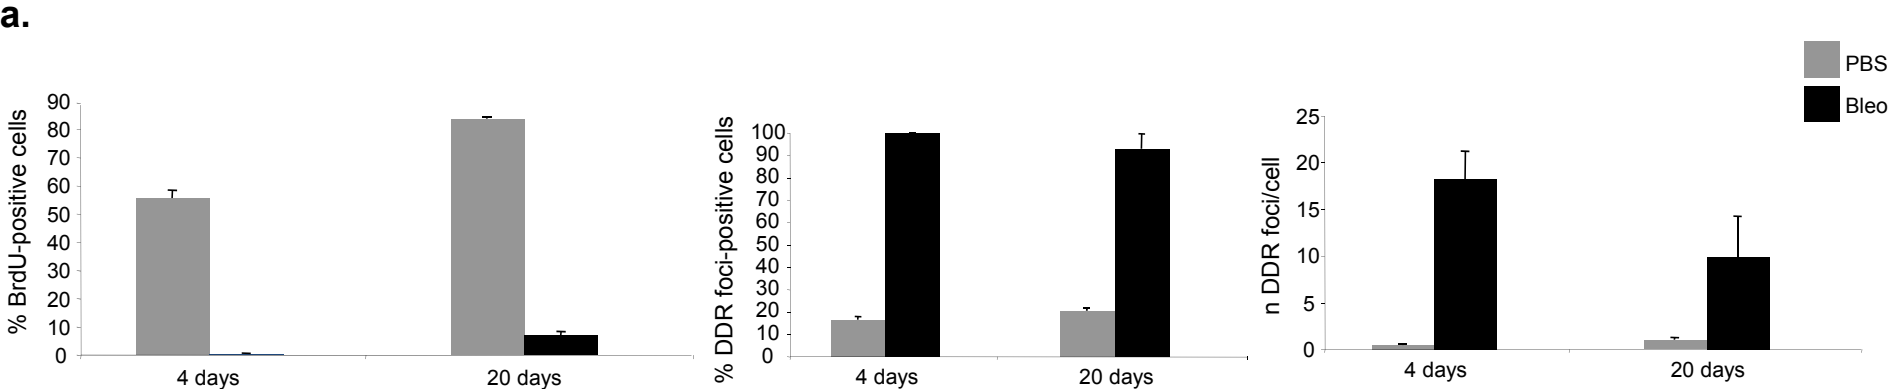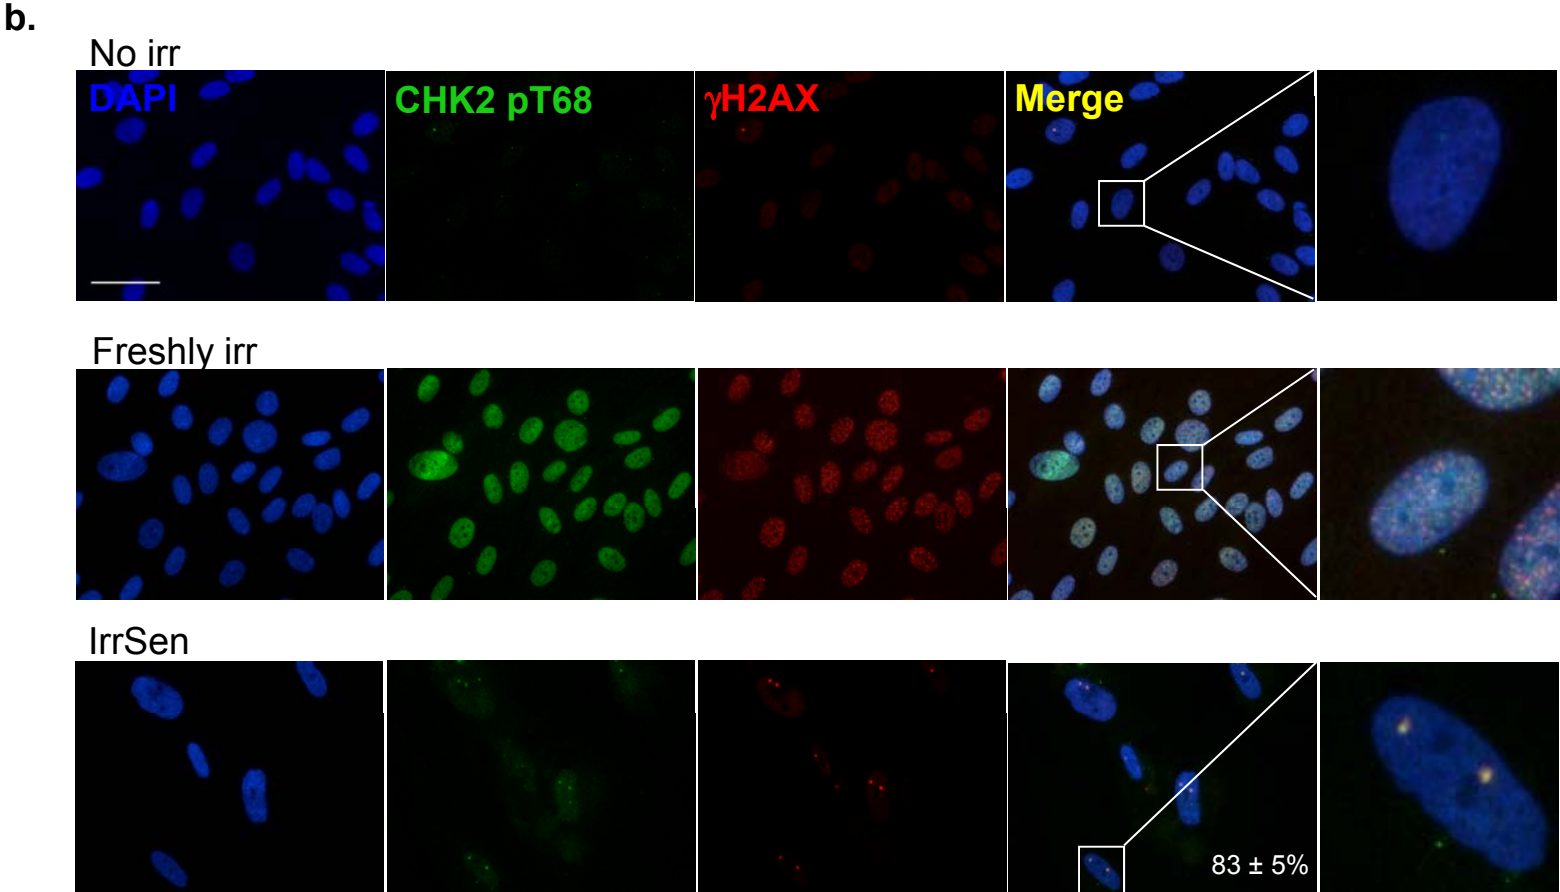

# Supplementary Fig. S4

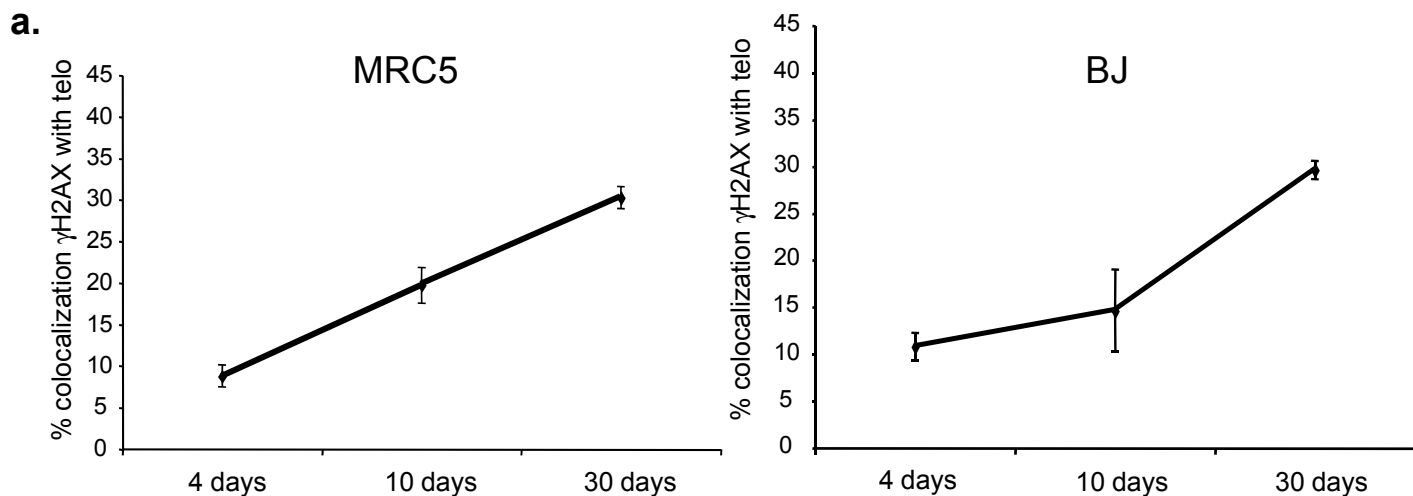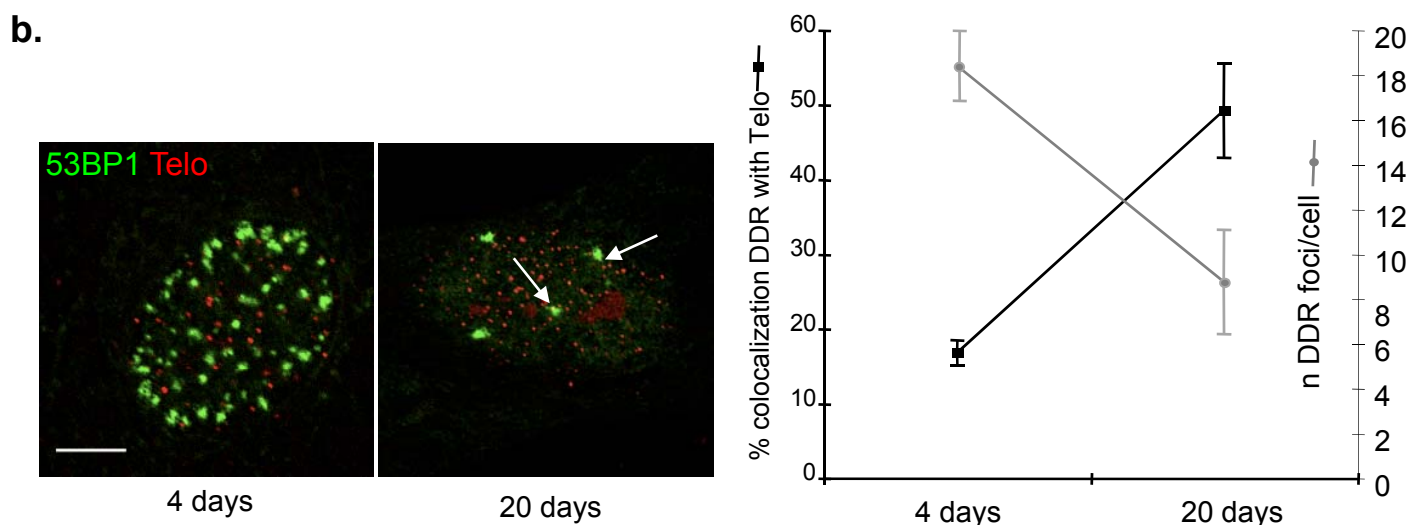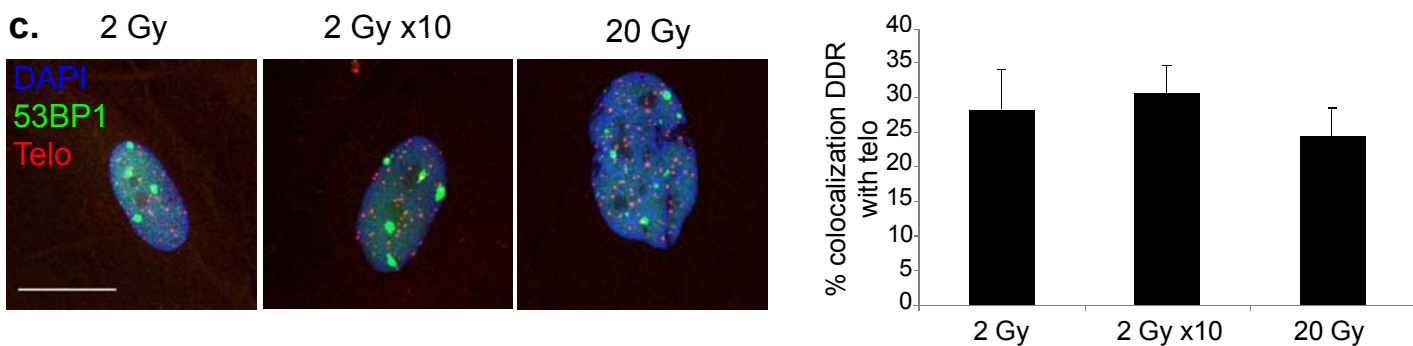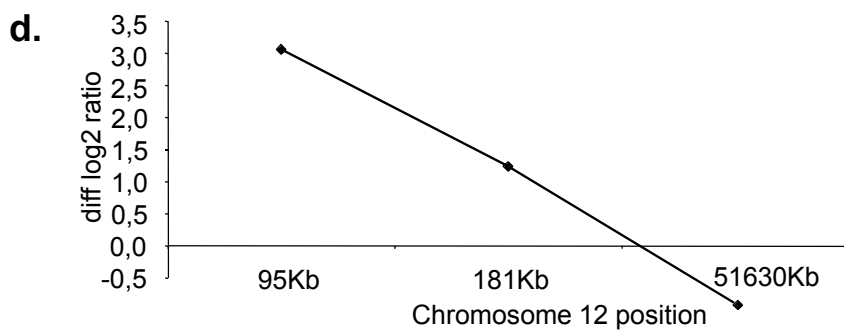

## Supplementary Fig. S5

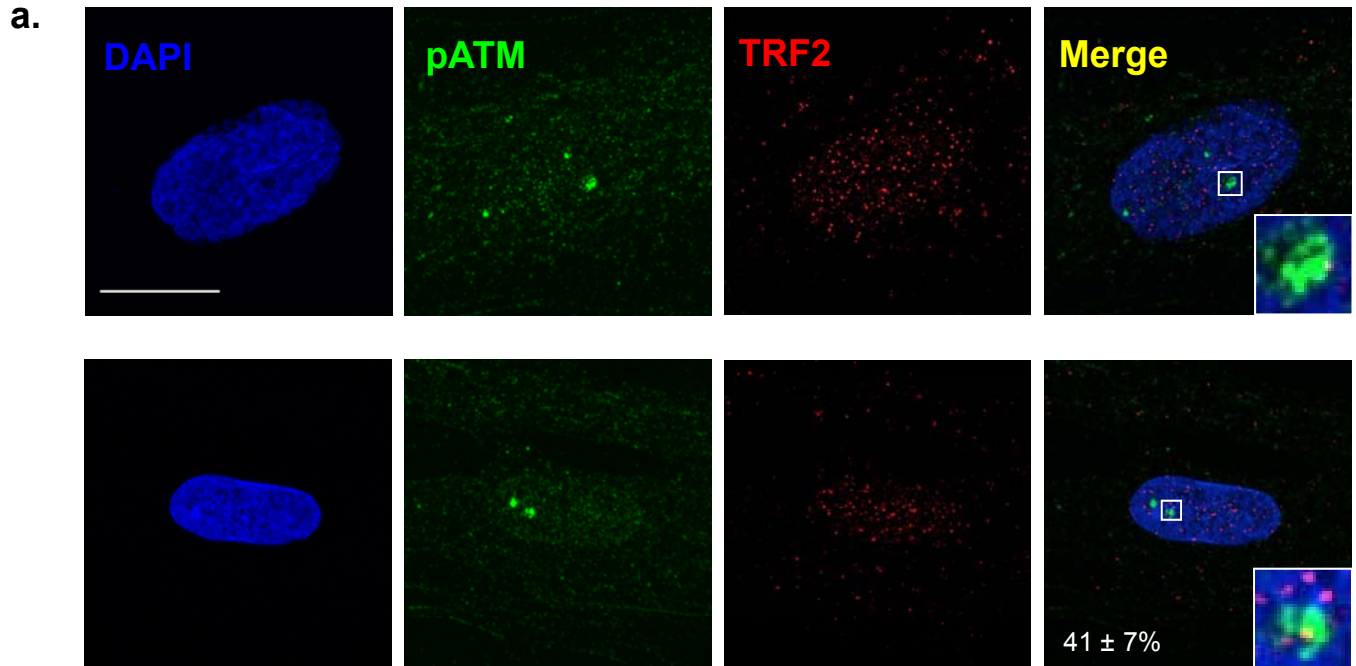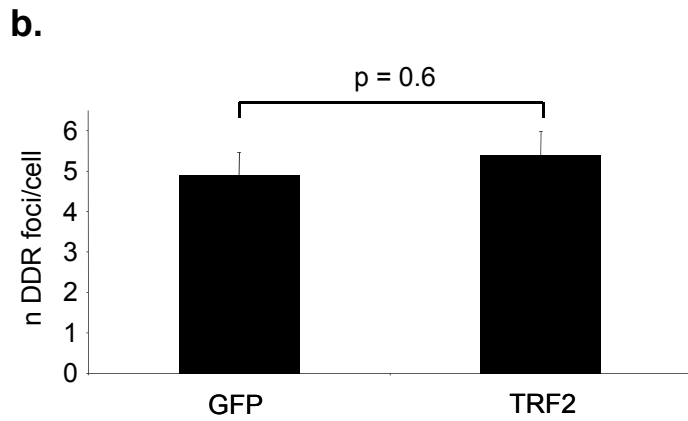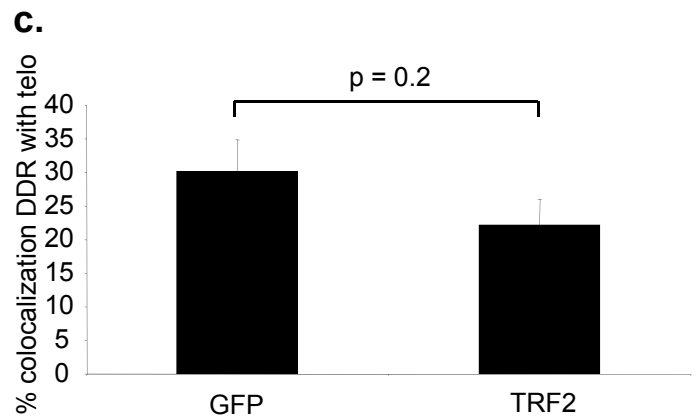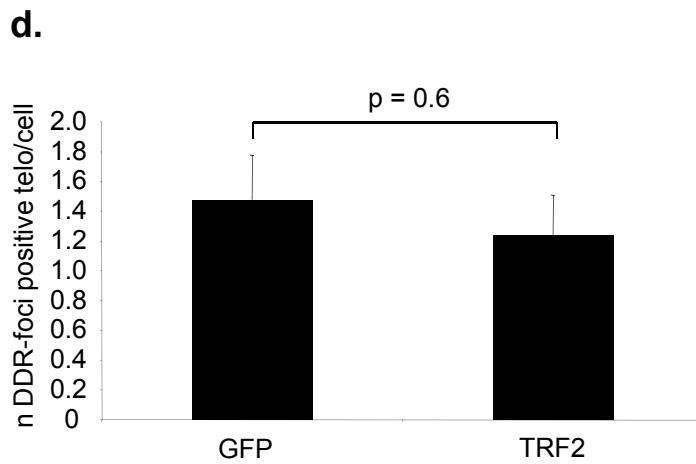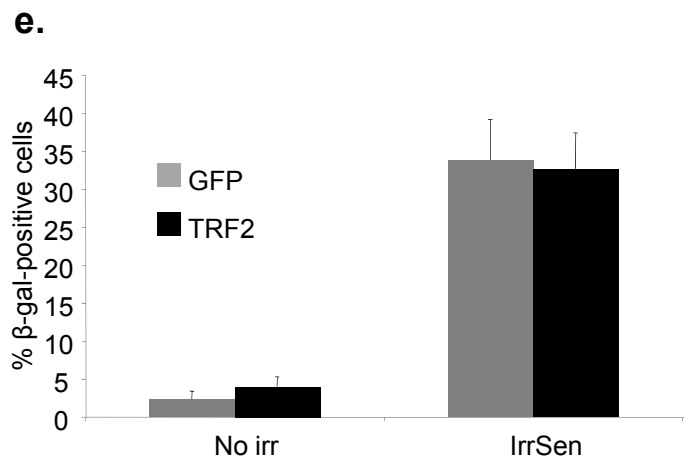

Supplementary Fig. S6

a.

I-SceI ON

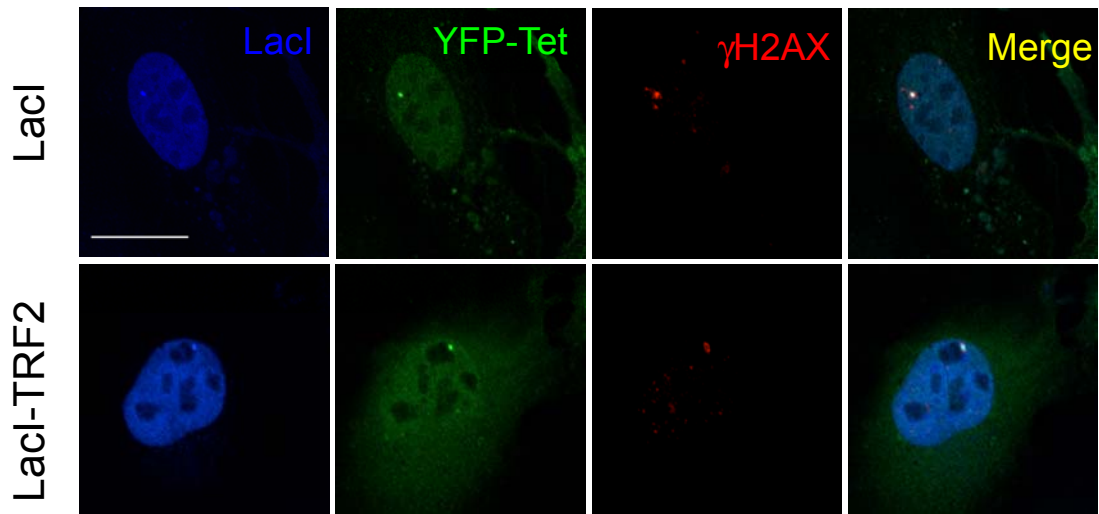

I-SceI OFF

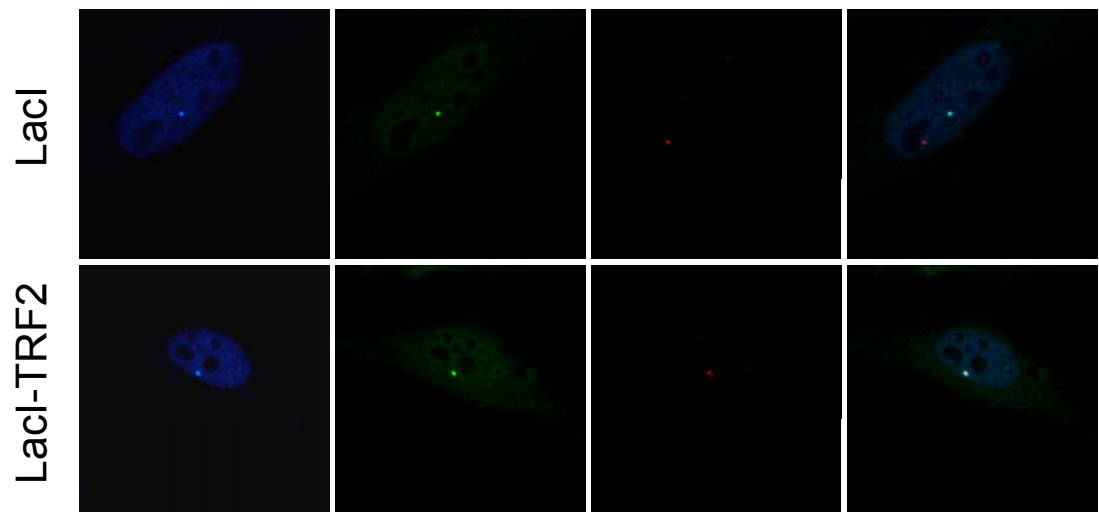

b.

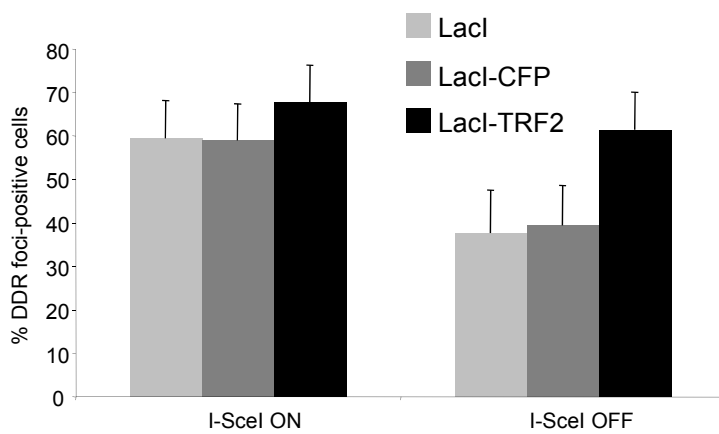

c.

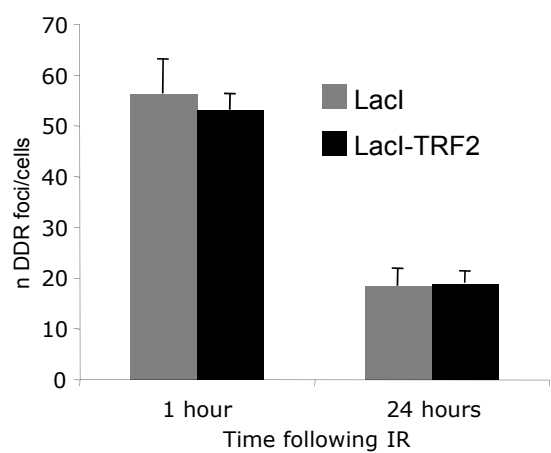

## Supplementary Fig. S7

**a.**

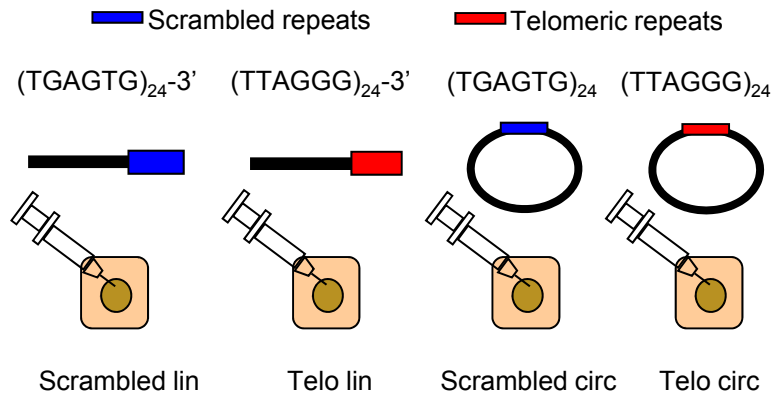

**b.**

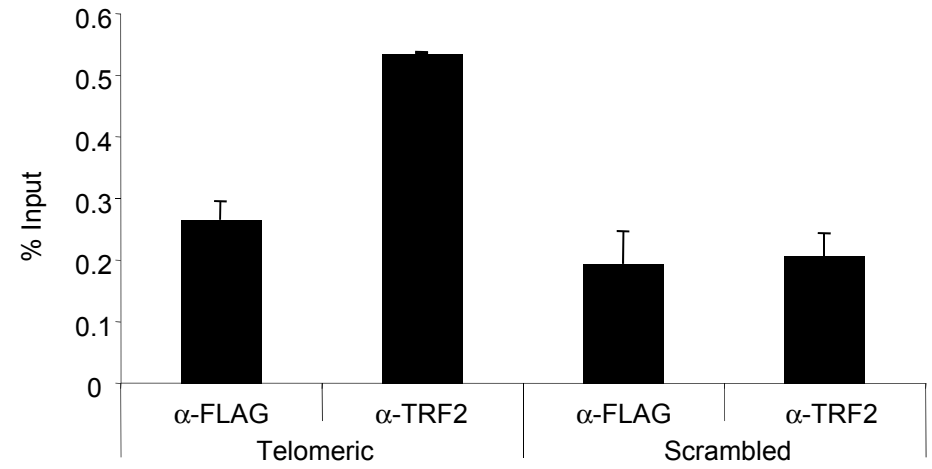

**c.**

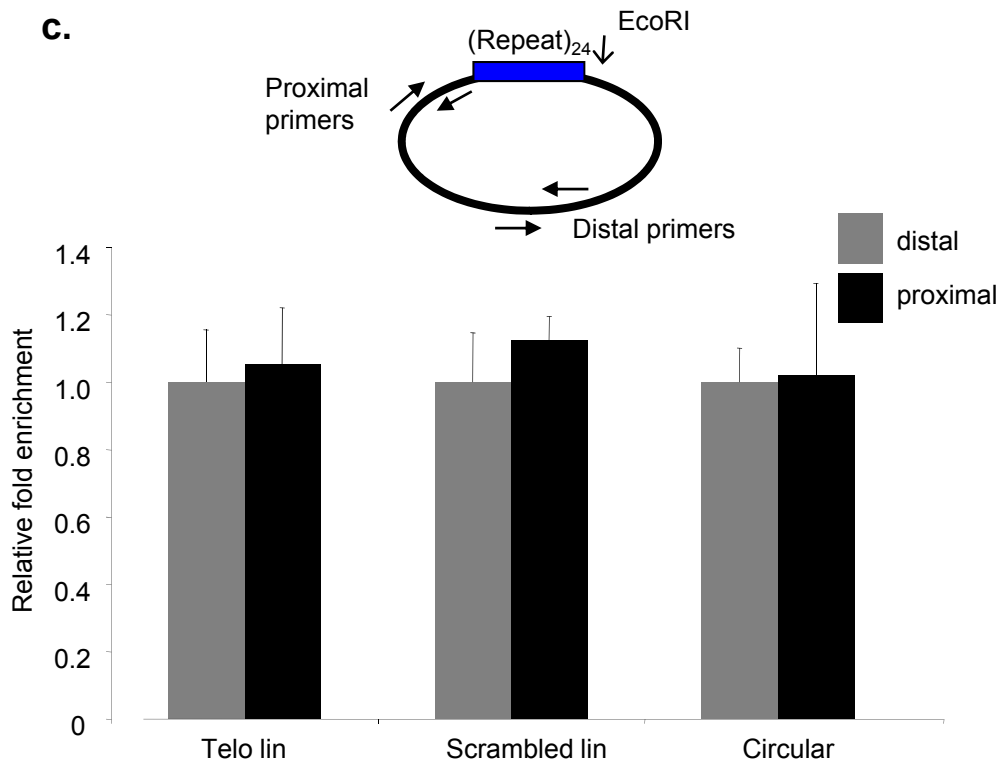

**d.**

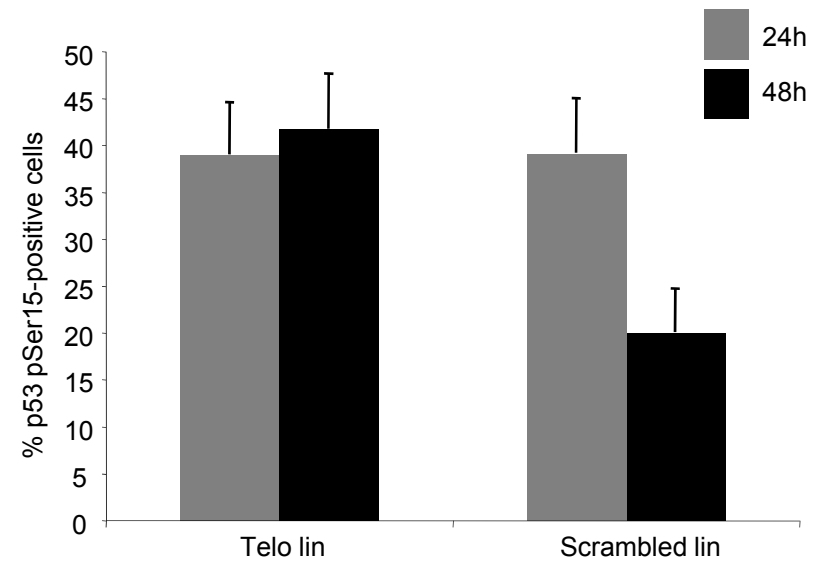

## Supplementary Fig. S8

**a.**

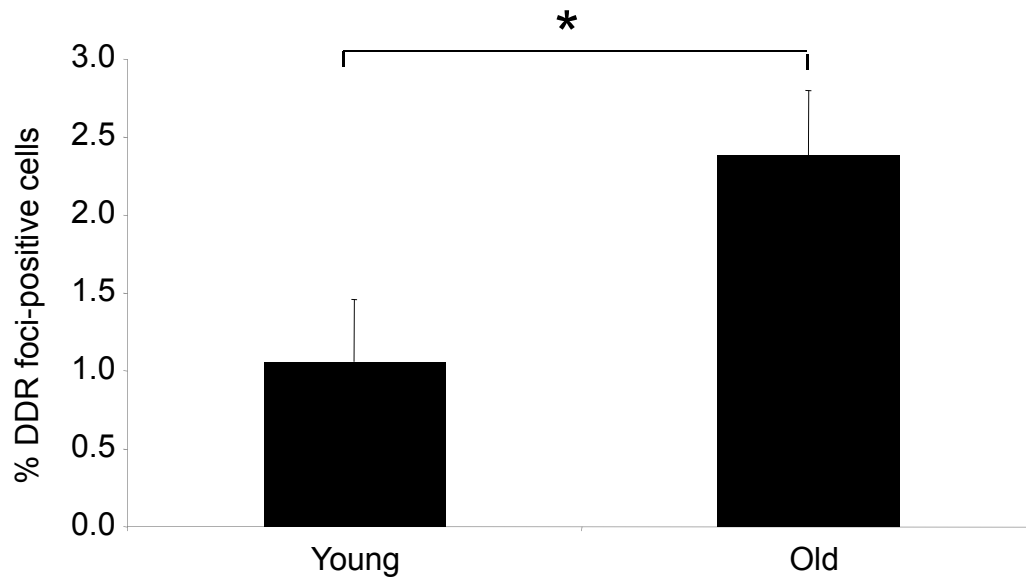

**b.**

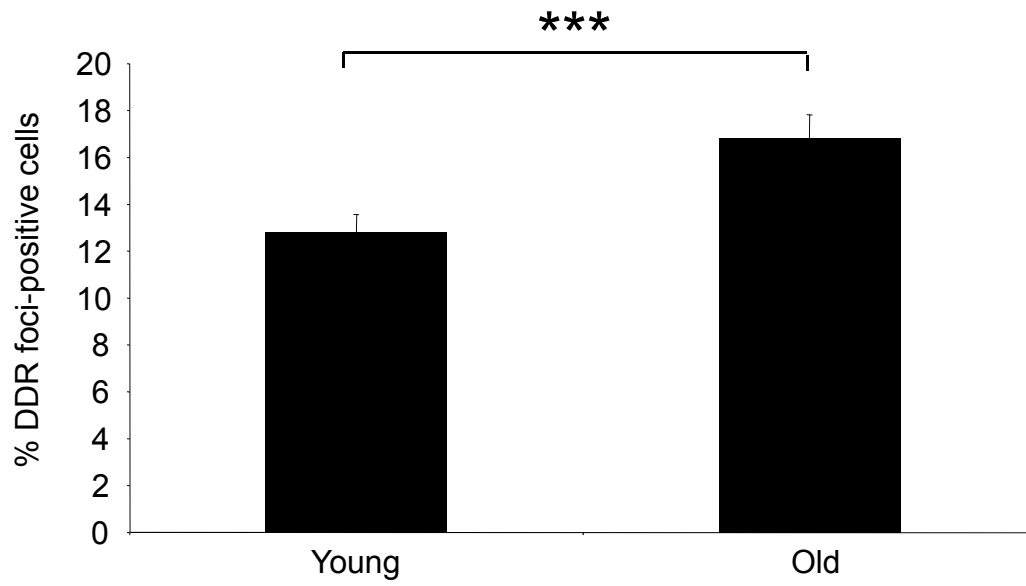

Supplement: NIHMS484988-supplement-Supp_Figs.pdf [file NIHMS484988-supplement-Supp_Figs.pdf]
